# Supplementary material
Source: publisher figshare collection journal article supplement (https://gsapubs.figshare.com/ndownloader/files/22758686)
Supplement: Supplementary file 1 [file 22758686]

**GSA Data Repository****The impact of lithification on the diversity, size distribution, and recovery dynamics of marine invertebrate assemblages.**

Jocelyn A. Sessa\*, Mark E. Patzkowsky, Timothy J. Bralower  
Department of Geosciences, Pennsylvania State University, University Park, Pennsylvania  
16802-2714, USA

All measurements and abundance data can be downloaded from the Paleobiology Database (<http://paleodb.org>) by searching for this publication (Sessa, Geology) in the “Reference search form”.

**Stratigraphic extent of samples:**

Assemblages immediately following the K-Pg mass extinction in the GCP are known to be depauperate in species and to contain unusually small sized taxa (Hansen, et al., 1987). To mitigate for these actual diversity and size trends confounding lithification patterns, samples and specimens from the oldest Danian, foraminiferal zone P0 and subzone P1a, are excluded from all comparisons of lithified versus unlithified units. Comparisons are performed on collections that span foraminiferal subzone P1b through zone P2 (from about 64.8 through ~61.7 Ma) (Fig. DR1).

**Collection methods:**

Since this article combines abundance data from bulk samples collected by several different authors, the collection methods of those studies are described here. In all studies, the total numbers of bivalved organisms are halved and identifications made to the species level whenever possible. All bulk samples represent an unbiased collection of individuals from a

constrained area of one outcrop. Hansen et al. (1993) report that unprocessed bulk samples were taken from a bed ranging from 5-12.5cm thick, which agrees with the general size of unprocessed bulk samples collected by J. Sessa. Toulmin (1977) does not report the size of an unprocessed bulk sample, but the re-collection of several Toulmin localities by J. Sessa finds similar taxonomic lists and diversities, indicating that his collection techniques were not widely divergent from the other studies. Sieve size was not reported by either Toulmin (1977) or Hansen et al. (1993); we used a 2mm sieve. Figures DR2a and b display comparisons of lithified and unlithified samples collected and processed by an individual.

#### **Potential paleoenvironmental confounds:**

A potential concern is whether unlithified and lithified samples come from the same environments and whether environments with low diversity and/or larger sized organisms are prone to lithification. Lithified, oyster dominated collections are found within the Clayton Fm, but these collections are excluded from analyses because this type of depositional setting is likely to be both preferentially lithified and to have low diversity assemblages. In general, samples from Alabama were deposited in a mixed, carbonate platform setting, whereas the Texas samples were deposited in deeper, siliciclastic dominated environments. Overall, this translates into higher lithification potential for units in Alabama. Indeed, bulk samples are unevenly distributed with respect to geographic area and lithification type: 3 unlithified samples come from AL, 12 unlithified samples from TX, 11 lithified samples from AL, 2 lithified samples from TX, and 3 poorly lithified samples from AL (Fig. DR1). To evaluate these potential confounds, lithified and unlithified units from the same bed, lithology, and paleoenvironment are compared (Figs. DR2a,b). Although sample size is small, we are able to compare lithified sandstone to unlithified

sands from the same bed and geographic area, and lithified claystones to unlithified clays, again from the same bed and geographic area. Regardless of the particular lithology/environment examined, lithified samples are statistically less diverse than their unlithified counterparts, the same pattern displayed in Figure 2. In Figure 2, analyses are constrained to glauconitic, silty to sandy, calcareous marls and their lithified equivalents, glauconitic silty to sandy limestones, both of which occur predominately in AL, and to silty clays, which occur predominately in TX.

In contrast to the abundance data, the size data comes almost entirely from two formations in Texas that are both variably lithified (Figs. DR1, 3a-d, and Table DR1). This variable lithification is even observed at the outcrop level (C. Garvie, L. Zachos, pers. comm.). Although the exact mechanism of lithification has not been studied, it seems plausible that fossiliferous horizons are variably lithified due to the local movement of carbonate saturated groundwater, which precipitates carbonate cement when reaching a fossiliferous horizon (via a similar mechanism as described in Fursich and Pandey, 2003).

Several different comparisons of the size distributions of unlithified and lithified specimens were performed to further assess potential confounds. Figure DR3a displays unlithified and lithified size distribution plots for one unit, the Wills Point Fm in TX. Table DR1 provides the lithologies and lithification state of all museum specimens - we use lithology as a proxy for paleoenvironment. Unlithified Wills Point specimens largely come from silty to sandy calcareous marls and lithified specimens predominately from the corresponding lithified lithology, silty to sandy limestones. Restricting analyses to this paleoenvironment finds the same patterns as including all Wills Point lithologies – the mean, median, and size distributions of lithified and unlithified specimens are all significantly different (Wilcoxon rank-sum test (Mann-Whitney test)  $p < 0.001$ , t-test  $p < 0.001$ , and Kolmogorov-Smirnov test,  $p < 0.001$ ) for both

height and width. This also suggests that lithification does not correlate with environments that sustain larger sized organisms, as the same environment (as best we can tell by using lithology as a proxy) is compared here. There are more lithified lithologies than unlithified ones, but this may partially result from the fact that unlithified specimens often do not have matrix archived with them (i.e., the ‘no information’ category in Table DR1).

Figure DR3b shows an example of unlithified and lithified specimens from the same unit (Kincaid Fm) at one locality. The lithology (silty clay) of the unlithified portion of this bed appears identical to that of the lithified portion of this unit, except that the lithified portion is indurated. Figures DR3c and DR3d contain similar comparisons to further illustrate that in TX, lithification does not appear to result from differing environmental conditions. Although it is possible that subtle environmental parameters not recorded by lithology differ between lithified and unlithified samples, we have tried to rule this possibility out by vetting the data in several different ways (Figs. DR2, DR3).

#### **Potential stratigraphic trend confounds:**

To assess whether any size trends that may occur through the Danian are confounding results, the size distributions of lithified and unlithified specimens from one unit are compared (Fig. DR3a-d). These distributions mirror the patterns found when data from multiple stratigraphic horizons are combined.

#### **Size estimates:**

There are several different ways to assess the body size of fossils. We did not use the common methods of geometric mean size or centroid size because many of the museum

specimens were not whole, and restricting analyses to whole specimens would reduce sample size. We note that height and width measurements are generally correlated with these more accurate assessments of body size (Lockwood, 2005).

**Figure 1:**

The averaged value of samples rarified to 70 individuals is plotted with corresponding standard deviations. No additional standardizations, such as subsampling, were used because of the small number of samples that comprise unlithified and lithified bins. Box and whisker plots, showing medians and quartiles, display the same patterns as shown with averages and standard deviations.

Although there are lithified late Cretaceous units in the Gulf Coastal Plain, there is no abundance data from these units that is comparable to the Paleocene samples used in this study in terms of collection and processing methods.

**Figure 3:**

The median size, average size, and the shape of the distributions of the two lithification states are significantly different (Wilcoxon rank-sum test (Mann-Whitney test)  $p < 0.001$ , t-test  $p < 0.001$ , and Kolmogorov-Smirnov test,  $p < 0.001$ ) for both height and width.

**Museum data**

Collections from the Paleontological Research Institution (PRI), the Department of Geology and Geophysics at Texas A&M University (TAMU), the Non-vertebrate Paleontology Laboratory at the University of Texas, Austin (NVPL), the Yale Peabody Museum (YPM), and

from the private collections of Mr. Christopher Garvie (Austin, TX) were used in this study. All measured specimens come from stratigraphic collections, rather than taxonomic collections, except for the PRI, where specimens from both stratigraphic and taxonomic collections were measured. No type specimens were measured in this study. The size of taxa in museum collections very likely represents an overestimation of taxon size relative to that in bulk samples (Barbour Wood et al., 2004). However, both unlithified and lithified collections will be affected in the same way by this bias. Because we use stratigraphic collections that frequently contain many individuals of a single taxon, the magnitude of this museum size bias should be less than if we had used only single estimates of taxon size or the size of type or published specimens, which often greatly overestimate a taxon's size relative to than in bulk samples (Kosnik et al., 2006).

In the collections of the PRI, NPL, and YPM specimens did not have individual museum identification numbers, but rather were listed in lots under a locality number. Specimens from TAMU and Mr. Garvie's collections were not assigned individual or locality numbers, nor were some PRI specimens. Table DR2 lists the locality numbers for collections measured from the PRI, NPL, and YPM.

## Supplemental References

- Barbour Wood, S., Kowalewski, M., and Ward, L.W., 2004, Quantifying collection biases in bulk, museum and literature-based molluscan sample data: Abstracts with programs - Geological Society of America, v. 36, p. 456.
- Crabbaugh, J.P., and Elsik, W.C., 2000, Calibration of the Texas Wilcox Group to the revised Cenozoic time scale; recognition of four, third-order clastic wedges (2.7-3.3 m.y. in duration): Bulletin of the South Texas Geological Society, v. 41, p. 10-17.
- Fursich, F.T., and Pandey, D.K., 2003, Sequence stratigraphic significance of sedimentary cycles and shell concentrations in the Upper Jurassic-Lower Cretaceous of Kachchh, western India: Palaeogeography Palaeoclimatology Palaeoecology, v. 193, p. 285-309.
- Frederiksen, N.O., 1991, Midwayan (Paleocene) pollen correlations in the Eastern United States: Micropaleontology, v. 37, p. 101-123.
- Gibson, T.G., Mancini, E.A., and Bybell, L.M., 1982, Paleocene to middle Eocene stratigraphy of Alabama: Thirty-second annual meeting of the Gulf Coast Association of Geological Societies, Houston, TX, v. 32, p. 449-458.
- Gradstein, F.M., Ogg, J.G., and Smith, A.G., 2004, A geologic time scale 2004: New York, Cambridge University Press.
- Hansen, T.A., Farrand, R.B., Montgomery, H.A., Billman, H.G., and Blechschmidt, G., 1987, Sedimentology and extinction patterns across the Cretaceous-Tertiary boundary interval in east Texas: Cretaceous Research, v. 8, p. 229-252.
- Kosnik, M.A., Jablonski, D., Lockwood, R., and Novack-Gottshall, P.M., 2006, Quantifying molluscan body size in evolutionary and ecological analyses; maximizing the return on data-collection efforts: PALAIOS, v. 21, p. 588-597.
- Siesser, W.G., 1984, Paleogene sea levels and climates; U.S.A. eastern Gulf Coastal Plain Palaeogeography, Palaeoclimatology, Palaeoecology, v. 47, p. 261-275.

| Epoch     | Age (Ma)  | Biostrat |     | Gp   | Formation (AL) | Member (AL)         | # of samples |        | # of specimens |        | Formation (TX) | Member (TX)           | # of samples |        | # of specimens |        |
|-----------|-----------|----------|-----|------|----------------|---------------------|--------------|--------|----------------|--------|----------------|-----------------------|--------------|--------|----------------|--------|
|           |           |          |     |      |                |                     | Lith         | Unlith | Lith           | Unlith |                |                       | Lith         | Unlith | Lith           | Unlith |
| Paleocene | Eocene    | Early    | P6b | NP11 | Hatch.         | upper Hatchetigbee  |              |        |                |        | Carrizo        |                       |              |        |                |        |
|           |           |          |     | NP10 |                | Bashi               |              |        |                |        | Sabine-town    |                       |              |        |                |        |
|           |           |          | P6a |      |                |                     |              |        |                |        |                |                       |              |        |                |        |
|           |           |          | P5  | NP9  | Tuscah.        | Bells Landing Marl  |              | 2      |                |        | Calvert Bluff  |                       |              |        |                |        |
|           |           |          |     |      |                | Greggs Landing Marl |              | 1      |                |        |                |                       |              |        |                |        |
|           |           |          | P4c |      |                | "Bear Creek Marl"   |              |        |                |        |                |                       |              |        |                |        |
|           |           |          | P4b | NP8  |                | Grampian Hills      | 1 poorly     |        |                |        | Simsboro       |                       |              |        |                |        |
|           |           |          |     | NP7  |                | "O. thirsae" beds   |              |        |                |        | Hooper         |                       |              |        |                |        |
|           |           |          | P4a | NP6  |                | Gravel Creek        |              |        |                |        | Seguin         | Caldwell Knob         | 1 poorly     | 1      |                |        |
|           |           |          | P3b | NP5  | Naheola        | Coal Bluff          |              |        |                |        |                |                       |              |        |                |        |
|           |           |          |     |      |                | Oak Hill            |              |        |                |        |                |                       |              |        |                |        |
|           | Paleocene | Middle   | P3a |      | Porters Creek  | Matthews Landing    |              | 8      |                | 66     | Wills Point    | Kerens                |              |        |                |        |
|           |           |          | P2  | NP4  |                | Lower member        | 2 poorly     | 3      | 13             |        |                | Mexia "V. bulla" zone | 2            | 1      | 5              | 214    |
|           |           |          | P1c |      |                |                     |              |        |                |        |                | Tehuacana             |              |        | 55             | 116    |
|           |           |          | P1b | NP3  | Clayton        | McBryde             | 1            |        | 17             |        | Kincaid        | Pisgah                |              | 8      | 7              | 462    |
|           |           |          |     | NP2  |                | Pine Barren         | 8 poorly     |        |                |        |                | Littig                |              | 3      | 491            | 41     |
|           |           |          | P1a | NP1  |                |                     |              |        |                |        |                |                       |              | 6      |                |        |
|           |           |          | P0  |      |                |                     |              |        |                |        |                |                       |              |        |                |        |
|           |           |          |     |      |                |                     |              |        |                |        |                |                       |              |        |                |        |
|           |           |          |     |      |                |                     |              |        |                |        |                |                       |              |        |                |        |
|           |           |          |     |      |                |                     |              |        |                |        |                |                       |              |        |                |        |
|           |           |          |     |      |                |                     |              |        |                |        |                |                       |              |        |                |        |
|           |           |          |     |      |                |                     |              |        |                |        |                |                       |              |        |                |        |
|           |           |          |     |      |                |                     |              |        |                |        |                |                       |              |        |                |        |
|           |           |          |     |      |                |                     |              |        |                |        |                |                       |              |        |                |        |
|           |           |          |     |      |                |                     |              |        |                |        |                |                       |              |        |                |        |
|           |           |          |     |      |                |                     |              |        |                |        |                |                       |              |        |                |        |
| K         |           |          |     |      |                |                     |              |        |                |        | Corsicana      |                       |              | 5      |                |        |



**Figure DR1.** Stratigraphic column of the latest Cretaceous and early Paleogene in Alabama (AL) and Texas (TX), showing the number of bulk samples with abundance data (i.e., samples that can be rarified) and the number of measured museum specimens by stratigraphic unit. Colored units indicate that we have data from that unit. The timescale follows that of Gradstein et al., 2004. Correlations and biostratigraphic placement follow Gibson et al., 1982; Siesser, 1983, Mancini and Tew, 1995; Frederiksen, 1998; Crabaugh and Elsik, 2000 and others.

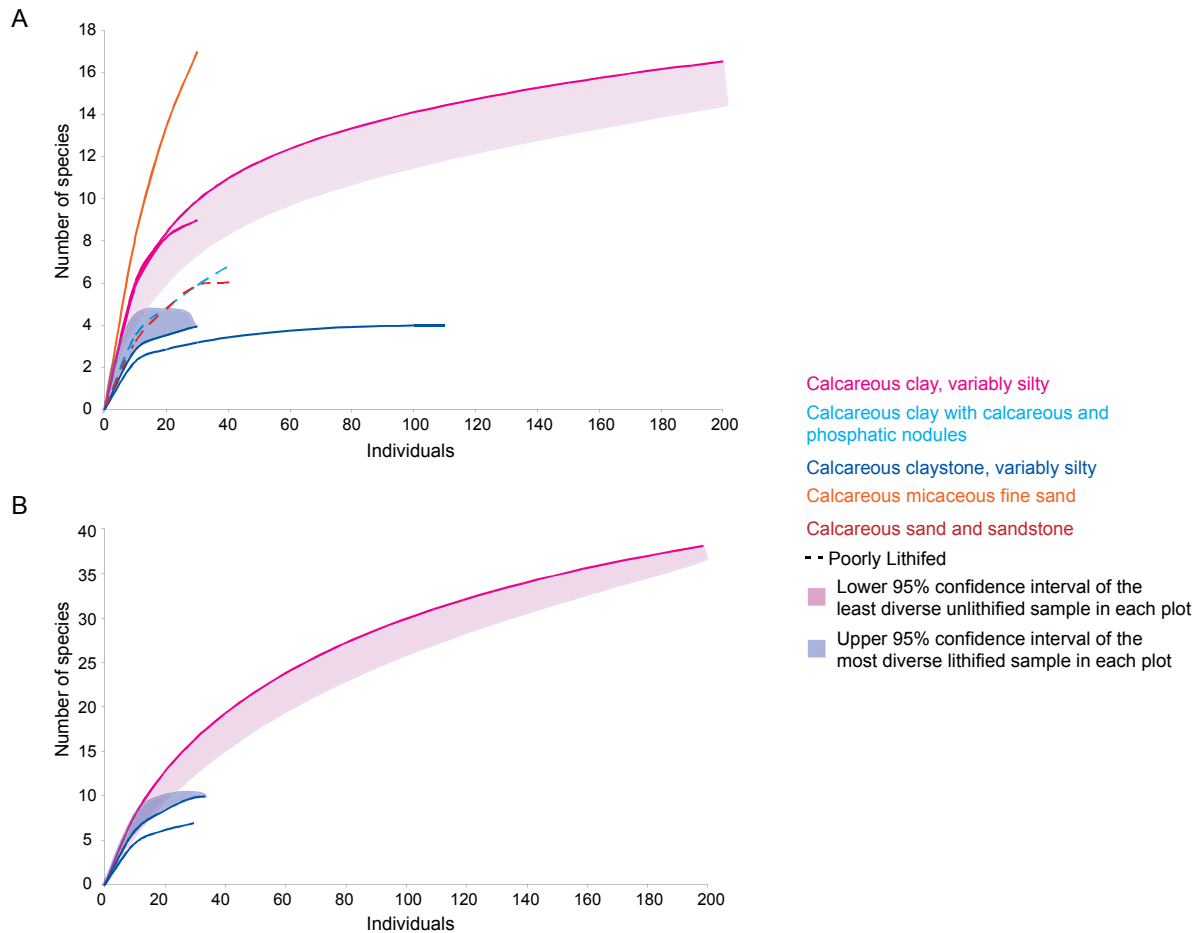

**Figure DR2. A:** Rarefaction curves for lithified, poorly lithified, and unlithified lower Porters Creek samples from a restricted geographical area in AL (samples were identified by Toulmin, 1977).

**B:** Rarefaction curves for lithified and unlithified Wills Point samples from a restricted geographical area in TX (samples were identified by J. Sessa).

Several rarefaction curves are truncated at 200 individuals to show detail. The lower 95% confidence interval of the least diverse unlithified sample and the upper 95% confidence interval of the most diverse lithified sample are plotted in each graph to show the nonoverlap of confidence intervals at sample sizes greater than ~20 individuals. As in figure 2, rarefaction finds statistically less diverse lithified samples at equivalent sizes.

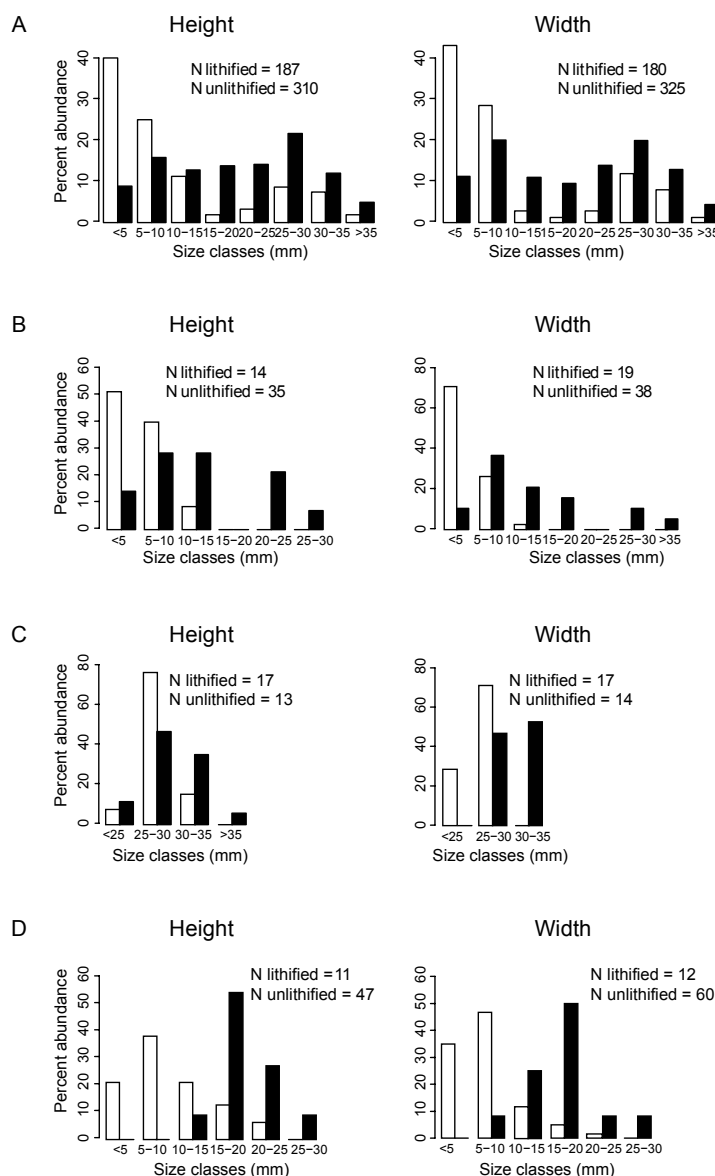

**Figure DR3. A:** Height and width distribution plots for unithified and lithified museum specimens from the Wills Point Fm in TX.

**B:** Height and width distribution plots for unithified and lithified specimens from the same bed at one locality: Kincaid Fm at Cedar Creek, 200' west of bridge, Bastrop Co., Tx. Lithified specimens come from an indurated silty clay, and unithified specimens some from a silty clay.

**C:** Height and width distribution plots for unithified and lithified *Venericardia* specimens from the Wills Point Fm at two nearby localities: lithified specimens are from 2.5 mi southwest of Littig, TX, and unithified specimens are from 5 mi south of Littig, TX.

**D:** Height and width distribution plots for unithified and lithified specimens from the same bed at two nearby localities: Tehuacana member, lithified specimens from 700 feet from Mexia-Wortham highway, unithified specimens 0.2 mi from Mexia-Wortham highway, TX.

225 The mean size, median size, and shape of the distributions of the two lithification states are  
226 significantly different for all comparisons shown, except for DR3C height comparisons (t-test  $p$   
227  $< 0.05$ , Wilcoxon rank-sum test  $p < 0.09$ , and Kolmogorov-Smirnov test,  $p < 0.23$ ).  
228

229

| undifferentiated Wills Point Formation |                |                                                      |                                                      |                      |                |                         |                |                                       |                |
|----------------------------------------|----------------|------------------------------------------------------|------------------------------------------------------|----------------------|----------------|-------------------------|----------------|---------------------------------------|----------------|
| Unlithified                            | # of specimens | Percentage                                           | Lithified                                            | # of specimens       | Percentage     |                         |                |                                       |                |
| clay                                   | 11             | 3.06                                                 | claystone                                            | 2                    | 0.92           |                         |                |                                       |                |
| silty clay                             | 107            | 29.81                                                | siltstone                                            | 5                    | 2.29           |                         |                |                                       |                |
| glauconitic calcareous sandy marl      | 211            | 58.77                                                | glauconitic calcareous sandy marl                    | 119                  | 54.59          |                         |                |                                       |                |
|                                        |                |                                                      | phosphatic and calcareous replaced molds, steinkerns | 44                   | 20.18          |                         |                |                                       |                |
|                                        |                |                                                      | sandstone                                            | 3                    | 1.38           |                         |                |                                       |                |
|                                        |                |                                                      | sandy grainstone                                     | 27                   | 12.39          |                         |                |                                       |                |
| no information                         | 30             | 8.36                                                 | no information                                       | 18                   | 8.26           |                         |                |                                       |                |
| Total                                  | 359            |                                                      | Total                                                | 218                  |                |                         |                |                                       |                |
| undifferentiated Kincaid Formation     |                |                                                      |                                                      |                      |                |                         |                |                                       |                |
| Unlithified                            | # of specimens | Percentage                                           | Lithified                                            | # of specimens       | Percentage     |                         |                |                                       |                |
| clay                                   | 11             | 3.87                                                 | silty claystone                                      | 29                   | 6.28           |                         |                |                                       |                |
| silty clay                             | 163            | 57.39                                                | glauconitic calcareous sandy marl                    | 27                   | 5.84           |                         |                |                                       |                |
| no information                         | 110            | 38.73                                                | glauconitic sandstone                                | 92                   | 19.91          |                         |                |                                       |                |
|                                        |                |                                                      | silty micaceous sandstone                            | 7                    | 1.52           |                         |                |                                       |                |
|                                        |                |                                                      | marly packstone                                      | 39                   | 8.44           |                         |                |                                       |                |
|                                        |                |                                                      | sandy grainstone                                     | 70                   | 15.15          |                         |                |                                       |                |
|                                        |                |                                                      | phosphatic and calcareous replaced molds, steinkerns | 198                  | 42.86          |                         |                |                                       |                |
| Total                                  | 284            |                                                      | Total                                                | 462                  |                |                         |                |                                       |                |
| Tehuacana member                       |                |                                                      |                                                      | Pisgah member        |                |                         |                | Littig member                         |                |
| Unlithified                            | # of specimens | Lithified                                            | # of specimens                                       | Unlithified          | # of specimens | Lithified               | # of specimens | Lithified                             | # of specimens |
| silty marl                             | 116            | phosphatic and calcareous replaced molds, steinkerns | 39                                                   | clay                 | 31             | indurated clay          | 7              | calcareous replaced molds, steinkerns | 480            |
|                                        |                |                                                      |                                                      | no information       | 10             |                         |                | glauconitic sandy marl                | 10             |
| undifferentiated Midway Gp             |                | Clayton Fm                                           |                                                      | Matthews Landing mbr |                | Lower Porters Creek mbr |                |                                       |                |
| Unlithified                            | # of specimens | Lithified                                            | # of specimens                                       | Unlithified          | # of specimens | Lithified               | # of specimens |                                       |                |
| light grey clay                        | 4              | grainstone                                           | 8                                                    | silty grey clay      | 66             | no information          | 13             |                                       |                |
| sandy marl                             | 1              | sandy grainstone                                     | 9                                                    |                      |                |                         |                |                                       |                |
| no information                         | 1              |                                                      |                                                      |                      |                |                         |                |                                       |                |

**Table DR1.** Museum specimen data separated by unit, lithology, and lithification state.

| Museum and Locality<br>Number |                |                           |
|-------------------------------|----------------|---------------------------|
| Garvie 15404                  | NPL-UT 4584    | NPL-UT 5281               |
| NPL-UT 11187                  | NPL-UT 4588    | NPL-UT 5424               |
| NPL-UT 11190                  | NPL-UT 4591    | NPL-UT 5428               |
| NPL-UT 11233                  | NPL-UT 4592    | NPL-UT 56-2934 (drawer #) |
| NPL-UT 11238                  | NPL-UT 4594    | NPL-UT 7189               |
| NPL-UT 12828                  | NPL-UT 4595    | NPL-UT 7193               |
| NPL-UT 128-T-8 (447)          | NPL-UT 4596    | NPL-UT 807                |
| NPL-UT 1374                   | NPL-UT 4598    | NPL-UT 8652               |
| NPL-UT 17548                  | NPL-UT 4601    | NPL-UT 8658               |
| NPL-UT 1785                   | NPL-UT 4604    | NPL-UT 8662               |
| NPL-UT 1788                   | NPL-UT 4606    | NPL-UT 9137               |
| NPL-UT 1998                   | NPL-UT 4607-12 | NPL-UT 9139               |
| NPL-UT 31187                  | NPL-UT 4613    | NPL-UT 9279               |
| NPL-UT 31193                  | NPL-UT 4614    | NPL-UT 9285               |
| NPL-UT 31239                  | NPL-UT 4615    | NPL-UT 9292               |
| NPL-UT 31279                  | NPL-UT 4616    | NPL-UT 9294               |
| NPL-UT 4236                   | NPL-UT 4618    | NPL-UT 9295               |
| NPL-UT 4548                   | NPL-UT 4619    | NPL-UT 9308               |
| NPL-UT 4553                   | NPL-UT 4622    | NPL-UT 9346               |
| NPL-UT 4557                   | NPL-UT 4624    | NPL-UT 9390               |
| NPL-UT 4560                   | NPL-UT 4625    | NPL-UT 9397               |
| NPL-UT 4562                   | NPL-UT 4626    | NPL-UT 9436               |
| NPL-UT 4563                   | NPL-UT 4627    | NPL-UT 9457               |
| NPL-UT 4564                   | NPL-UT 4628    | NPL-UT 9503               |
| NPL-UT 4565                   | NPL-UT 4629    | NPL-UT 9510               |
| NPL-UT 4566                   | NPL-UT 4633    | NPL-UT 9622               |
| NPL-UT 4567                   | NPL-UT 4636    | NPL-UT PCNo.31173, 12388  |
| NPL-UT 4568                   | NPL-UT 4637    | YPM 3506                  |
| NPL-UT 4569                   | NPL-UT 4639    | YPM 3776                  |
| NPL-UT 4570                   | NPL-UT 4642    | YPM 7045 - 04581          |
| NPL-UT 4571                   | NPL-UT 4643    | PRI 12018                 |
| NPL-UT 4572                   | NPL-UT 4646    | PRI 12053                 |
| NPL-UT 4573                   | NPL-UT 4647    | PRI 1313C                 |
| NPL-UT 4574                   | NPL-UT 4648    | PRI 1763E                 |
| NPL-UT 4575                   | NPL-UT 4652    | PRI 2800E                 |
| NPL-UT 4576                   | NPL-UT 4655    | PRI 9382                  |
| NPL-UT 4577                   | NPL-UT 4656    | PRI 9494                  |
| NPL-UT 4578                   | NPL-UT 4658    | PRI 9521                  |
| NPL-UT 4579                   | NPL-UT 4668    | PRI 9524                  |
| NPL-UT 4580                   | NPL-UT 4671    | PRI 9542                  |
| NPL-UT 4582                   | NPL-UT 4675    | PRI 9593                  |
| NPL-UT 4583                   | NPL-UT 4692    |                           |

235 **Table DR2.** Locality numbers for measured specimens from the Non-vertebrate Paleontology  
236 Laboratory at the University of Texas, Austin (NPL), the Paleontological Research Institution  
237 (PRI), and the Yale Peabody Museum (YPM).
